# Supplementary material for: Use of Occult Blood Detection Cards for Real-Time PCR-Based Diagnosis of Schistosoma Mansoni Infection
Source: PubMed Central journal article supplement (PMC4567332; doi:10.1371/journal.pone.0137730), 2015-09-11
Supplement: pone.0137730.s001.pdf [file pone.0137730.s001.pdf]

S1 Table Baseline data clinical samples:

| Probe-N° | Sex | Age | Microscopy Schistosomiasis | Microscopy other parasites                         | Ct-value - fecal card | Ct-value - frozen stool |
|----------|-----|-----|----------------------------|----------------------------------------------------|-----------------------|-------------------------|
| 4        | f   | 5   | negative                   |                                                    | 0,00                  | 0,00                    |
| 13       | f   | 6   | negative                   |                                                    | 0,00                  | 0,00                    |
| 16       | f   | 19  | negative                   |                                                    | 0,00                  | 0,00                    |
| 21       | f   | 35  | negative                   |                                                    | 0,00                  | 0,00                    |
| 32       | m   | 9   | negative                   |                                                    | 0,00                  | 0,00                    |
| 36       | m   | 5   | negative                   |                                                    | 0,00                  | 0,00                    |
| 37       | m   | 4   | negative                   |                                                    | 0,00                  | 0,00                    |
| 97       | m   | 20  | negative                   |                                                    | 0,00                  | 0,00                    |
| 11       | m   | 4   | negative                   | <i>Ascaris lumbricoides</i>                        | 0,00                  | 0,00                    |
| 14       | f   | 14  | negative                   | <i>Ascaris lumbricoides</i>                        | 0,00                  | 0,00                    |
| 20       | m   | 11  | negative                   | <i>Ascaris lumbricoides</i>                        | 0,00                  | 0,00                    |
| 30       | m   | 6   | negative                   | <i>Ascaris lumbricoides</i>                        | 0,00                  | 0,00                    |
| 40       | m   | 5   | negative                   | <i>Ascaris lumbricoides</i>                        | 0,00                  | 0,00                    |
| 12       | f   | 12  | negative                   | <i>Ascaris lumbricoides</i> + Hookworm             | 0,00                  | 0,00                    |
| 39       | f   | 25  | negative                   | <i>Ascaris lumbricoides</i> + <i>T. trichiuris</i> | 0,00                  | 0,00                    |
| 26       | f   | 10  | negative                   | <i>Ascaris lumbricoides</i> + <i>Taenia spp.</i>   | 0,00                  | 0,00                    |
| 25       | f   | 8   | negative                   | <i>H.nana</i>                                      | 0,00                  | 0,00                    |
| 29       | m   | 4   | negative                   | <i>H.nana</i>                                      | 0,00                  | 0,00                    |
| 38       | m   | 4   | negative                   | Hookworm                                           | 0,00                  | 0,00                    |
| 35       | f   | 40  | negative                   | <i>Taenia spp.</i>                                 | 0,00                  | 0,00                    |
| 28       | f   | 7   | <i>S. mansoni</i>          | <i>H. nana</i>                                     | 38,03                 | 0,00                    |
| 94       | m   | 11  | <i>S. mansoni</i>          |                                                    | 38,91                 | 0,00                    |
| 1        | m   | 50  | <i>S. mansoni</i>          |                                                    | 0,00                  | 29,17                   |
| 79       | m   | 4   | <i>S. mansoni</i>          |                                                    | 0,00                  | 26,14                   |
| 91       | m   | 11  | <i>S. mansoni</i>          |                                                    | 0,00                  | 30,19                   |
| 95       | f   | 10  | <i>S. mansoni</i>          |                                                    | 31,51                 | 23,65                   |
| 92       | m   | 13  | <i>S. mansoni</i>          |                                                    | 29,67                 | 25,83                   |
| 34       | f   | 25  | <i>S. mansoni</i>          |                                                    | 31,66                 | 25,97                   |
| 65       | m   | 12  | <i>S. mansoni</i>          |                                                    | 34,07                 | 26,00                   |
| 33       | m   | 7   | <i>S. mansoni</i>          |                                                    | 34,02                 | 26,85                   |
| 27       | m   | 6   | <i>S. mansoni</i>          |                                                    | 27,13                 | 27,14                   |
| 31       | f   | 80  | <i>S. mansoni</i>          |                                                    | 30,38                 | 27,49                   |
| 72       | m   | 12  | <i>S. mansoni</i>          |                                                    | 35,17                 | 27,97                   |
| 88       | f   | 15  | <i>S. mansoni</i>          |                                                    | 36,76                 | 28,16                   |
| 89       | f   | 9   | <i>S. mansoni</i>          |                                                    | 32,01                 | 28,24                   |

S1 Table Baseline data clinical samples:

|    |   |    |                   |                                                          |       |       |
|----|---|----|-------------------|----------------------------------------------------------|-------|-------|
| 9  | m | 9  | <i>S. mansoni</i> |                                                          | 29,97 | 28,49 |
| 22 | f | 5  | <i>S. mansoni</i> |                                                          | 31,78 | 28,59 |
| 10 | m | 11 | <i>S. mansoni</i> |                                                          | 41,54 | 29,10 |
| 50 | m | 14 | <i>S. mansoni</i> |                                                          | 34,20 | 29,13 |
| 7  | m | 12 | <i>S. mansoni</i> |                                                          | 29,39 | 29,26 |
| 87 | m | 8  | <i>S. mansoni</i> |                                                          | 30,58 | 29,80 |
| 90 | m | 9  | <i>S. mansoni</i> |                                                          | 35,38 | 29,84 |
| 81 | m | 8  | <i>S. mansoni</i> |                                                          | 33,52 | 30,06 |
| 17 | f | 20 | <i>S. mansoni</i> |                                                          | 31,08 | 30,35 |
| 19 | m | 10 | <i>S. mansoni</i> |                                                          | 35,43 | 31,75 |
| 8  | m | 12 | <i>S. mansoni</i> |                                                          | 34,85 | 32,41 |
| 6  | m | 11 | <i>S. mansoni</i> |                                                          | 30,22 | 32,76 |
| 48 | f | 11 | <i>S. mansoni</i> |                                                          | 30,89 | 39,77 |
| 15 | f | 8  | <i>S. mansoni</i> | <i>Ascaris lumbricoides</i>                              | 32,45 | 24,40 |
| 23 | f | 12 | <i>S. mansoni</i> | <i>Ascaris lumbricoides</i>                              | 35,59 | 25,75 |
| 70 | f | 11 | <i>S. mansoni</i> | <i>Ascaris lumbricoides</i>                              | 36,09 | 28,88 |
| 24 | f | 7  | <i>S. mansoni</i> | <i>H. diminata + Ascaris lumbricoides+ T. trichiuris</i> | 35,75 | 28,06 |
| 5  | m | 13 | <i>S. mansoni</i> | <i>Hookworm</i>                                          | 35,17 | 28,27 |
| 93 | m | 36 | <i>S. mansoni</i> | <i>Hookworm</i>                                          | 33,69 | 31,24 |
| 63 | m | 12 | <i>S. mansoni</i> | <i>T. trichuria</i>                                      | 32,05 | 30,48 |

Abbreviations: m = male, f = female, Ct = cycle threshold
