# Supplementary material for: Use of Occult Blood Detection Cards for Real-Time PCR-Based Diagnosis of Schistosoma Mansoni Infection
Source: PubMed Central journal article supplement (PMC4567332; doi:10.1371/journal.pone.0137730), 2015-09-11
Supplement: pone.0137730.s002.pdf [file pone.0137730.s002.pdf]

S2 Table Dilutions of cloned IST-2 template:

| N° | Plasmid specification                       | Dilution        | Result 20.01.14 |          | Result 21.01.14 |          |
|----|---------------------------------------------|-----------------|-----------------|----------|-----------------|----------|
| 1  | Schistosoma mansoni<br>cloned ITS Standard* | 10 <sup>1</sup> | positive        | positive | positive        | positive |
| 2  | Schistosoma mansoni<br>cloned ITS Standard  | 10 <sup>2</sup> | positive        | positive | positive        | positive |
| 3  | Schistosoma mansoni<br>cloned ITS Standard  | 10 <sup>3</sup> | positive        | positive | positive        | positive |
| 4  | Schistosoma mansoni<br>cloned ITS Standard  | 10 <sup>4</sup> | positive        | positive | positive        | positive |
| 5  | Schistosoma mansoni<br>cloned ITS Standard  | 10 <sup>5</sup> | positive        | positive | positive        | positive |
| 6  | Schistosoma mansoni<br>cloned ITS Standard  | 10 <sup>6</sup> | positive        | positive | positive        | positive |
| 7  | Schistosoma mansoni<br>cloned ITS Standard  | 10 <sup>7</sup> | positive        | positive | positive        | positive |

\*cloned by GenExpress™
